# Supplementary material for: Prevalence and Correlates of Depression in Individuals With and Without Type 1 Diabetes
Source: Oxford University Press journal article supplement (doi:10.2337/dc08-1835), 2009-01-26
Supplement: dc08-1835_online_appendix.doc [file dc08-1835_online_appendix.doc]

**Table A1** Prevalence of CAC Score > 0 by Depression and Type 1 Diabetes Status

|  | **TYPE 1 DIABETES**  **% CAC Score > 0** | | **Non-DM**  **% CAC Score > 0** | |
| --- | --- | --- | --- | --- |
| **Classification** | **Depressed** | **Not Depressed** | **Depressed** | **Not Depressed** |
| **Depressed by BDI-II > 14** | **74.7%**** | **56.6%** | **44.4%** | **47.3%** |
| **Antidepressant use** | **64.0%** | **58.6%** | **48.3%** | **47.4%** |
| **BDI or Medications** | **67.4%**** | **56.1%** | **46.3%** | **47.7%** |

Note. **p < 0.05 for CAC (>0). More participants with type 1 diabetes had CAC scores > 0 than controls without diabetes regardless of depression status (59.4% vs. 47.3%, p=0.0002) and more depressed patients had CAC scores > 0 than non-depressed participants regardless of diabetes status, OR = 1.87 (1.20-2.91) p = 0.0054 using Logistic Regression.

**Table A2 Prevalence of depression by complication status**

|  | **T1DM w/o Complications** | **T1DM with Complications** | **Non-DM** | **p-value** |
| --- | --- | --- | --- | --- |
| **Depressed by BDI-II > 14** | **12.1%**a | **23.4%** | **5.7%** | **< 0.0001** |
| **Antidepressant use** | **19.7%**b | **21.8%** | **12.1%** | **0.0010** |
| **BDI or Medications** | **27.9%**a | **36.7%** | **16.0%** | **< 0.0001** |

Note. aP = 0.0016 for T1DM w/o complications versus Non-DM controls.

bP = 0.0053 for T1DM w/o complications versus Non-DM controls.

cP = 0.0001 for T1DM w/o complications versus Non-DM controls.
